# Supplementary material
Source: publisher site journal article supplement (https://www.dovepress.com/article/587357)
Supplement: Supplementary file 1 [file 587357%20Supplementary%20Material.docx]

# **S**upplementary Material

## Calculation Formulas for Derived Biomarkers and Indices

To ensure the reproducibility of our study, the detailed calculation formulas for the derived biomarkers and composite indices used in the predictive model are provided below:

Triglyceride-Glucose (TyG) Index:

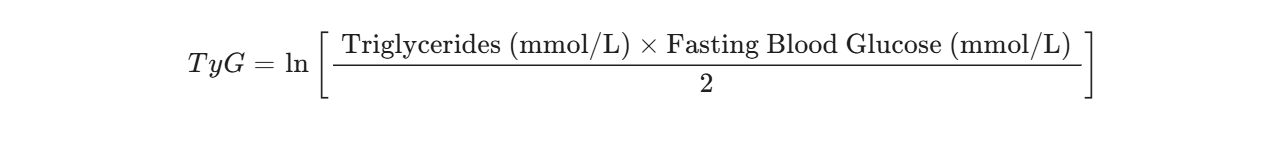

*Note : In this study, the TyG index was calculated utilizing mmol/L values directly derived from laboratory reports. Consequently, the numerical range (typically~1.5-3.0) differs from the standard mg/dL-based index (~8.0-10.0). However, as the transformation is logarithmic, the mathematical correlation with insulin resistance remains preserved.*

Non-High-Density Lipoprotein Cholesterol (Non-HDL-C):

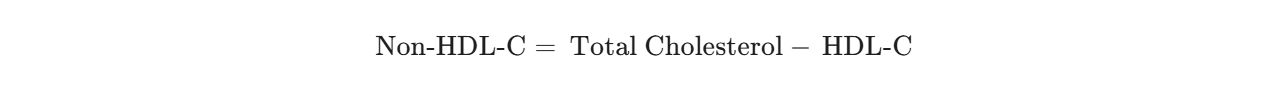


Atherogenic Index of Albumin (AAI):

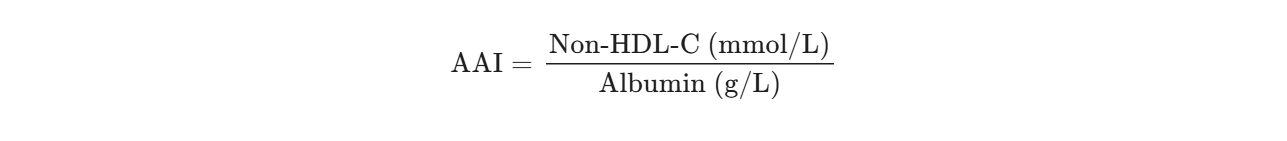


CRP-Albumin-Lymphocyte (CALLY) Index:

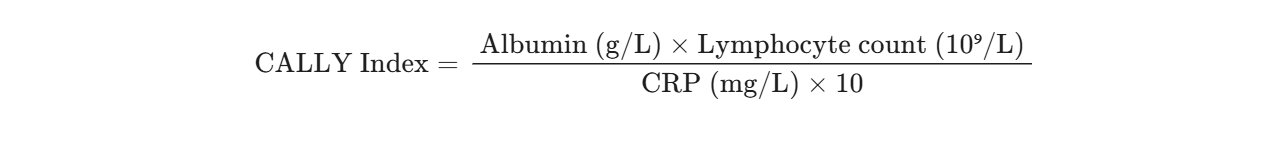


Neutrophil-to-Lymphocyte Ratio (NLR):

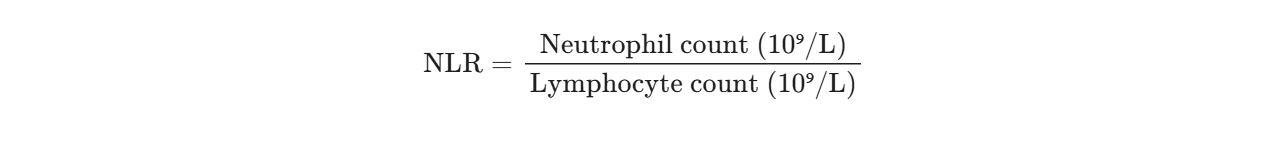


Platelet-to-Lymphocyte Ratio (PLR):

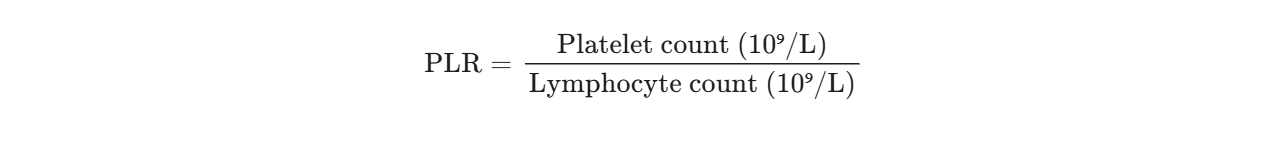


Systemic Immune-Inflammation Index (SII):

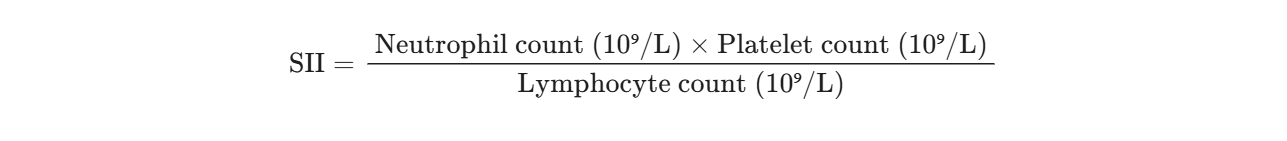


Systemic Inflammation Response Index (SIRI):

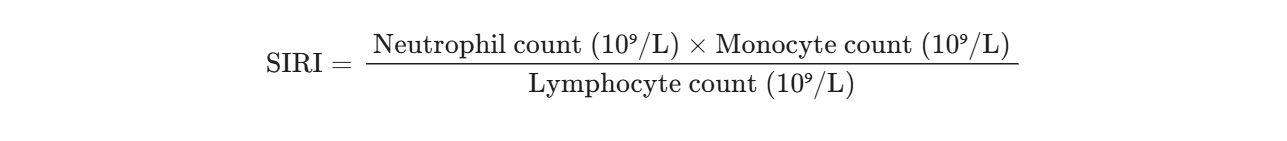


Neutrophil-to-Albumin Ratio (NAR):

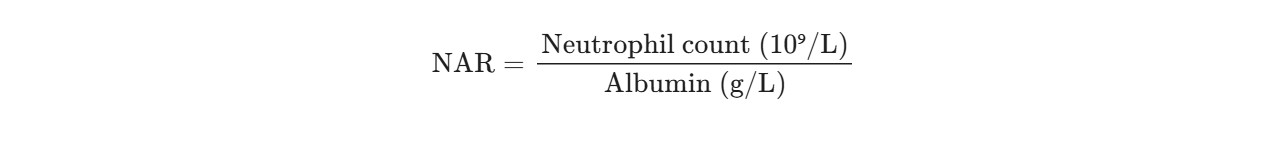


ALT/AST Ratio:

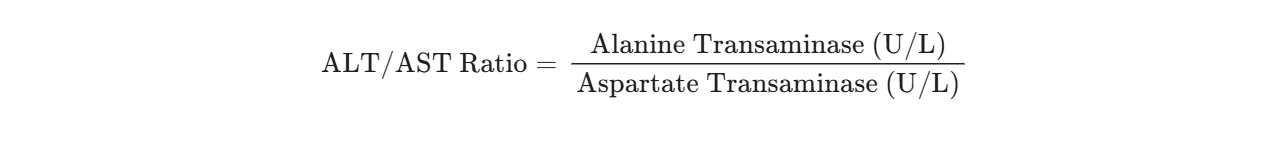


Note on Data Collection: All biological samples were collected following a minimum 8-hour overnight fast. Standardized laboratory procedures and certified biochemical assays were employed for all measurements.
